# Supplementary material for: Recombinant Bovine Growth Hormone-Induced Metabolic Remodelling Enhances Growth of Gilthead Sea-Bream (Sparus aurata): Insights from Stable Isotopes Composition and Proteomics
Source: MDPI journal article supplement (doi:10.3390/ijms222313107), 2021-12-03
Supplement: s1 [file s1]

**Title:** Recombinant bovine growth hormone-induced metabolic remodelling enhances growth of gilthead sea-bream (*Sparus aurata*): insights from stable isotopes composition and proteomics

**Authors:**

J. Blasco, E.J. Vélez<sup>2</sup>, M. Perelló, Sh. Azizi, E. Capilla, J. Fernández-Borràs, J. Gutiérrez

**Supplementary materials**

**Table S1:** Summary of the Gene Ontology (GO) terms of the biological processes obtained from the functional enrichment analysis for the differentially expressed proteins of white muscle after 9 weeks of rBGH injection on gilthead seabream juveniles.

**Figure S1:** Reproducibility of 2D-gels: CT1 to GH6.

**Table S2:** Raw data spots

**Supplementary text:** Details of LC-MS/MS analysis and Data base search

**Table S1:** Summary of the Gene Ontology (GO) terms of the biological processes obtained from the functional enrichment analysis for the differentially expressed proteins of white muscle after 9 weeks of rBGH injection on gilthead seabream juveniles.

## Network Stats

number of nodes: 13  
 number of edges: 49  
 average node degree: 7.54  
 avg. local clustering coefficient: 0.846

expected number of edges: 6  
 PPI enrichment p-value: < 1.0e-16

*your network has significantly more interactions  
 than expected (what does that mean?)*

## Functional enrichments in your network

### Biological Process (GO)

| GO-term    | description                                              | count in network | false discovery rate |
|------------|----------------------------------------------------------|------------------|----------------------|
| GO:0006754 | ATP biosynthetic process                                 | 8 of 75          | 8.19e-14             |
| GO:0042866 | pyruvate biosynthetic process                            | 7 of 42          | 1.15e-13             |
| GO:0016052 | carbohydrate catabolic process                           | 8 of 104         | 1.15e-13             |
| GO:0009168 | purine ribonucleoside monophosphate biosynthetic process | 8 of 98          | 1.15e-13             |
| GO:0006757 | ATP generation from ADP                                  | 7 of 39          | 1.15e-13             |
| GO:0006096 | glycolytic process                                       | 7 of 38          | 1.15e-13             |
| GO:0019674 | NAD metabolic process                                    | 7 of 66          | 5.52e-13             |
| GO:0006090 | pyruvate metabolic process                               | 7 of 66          | 5.52e-13             |
| GO:0061718 | glucose catabolic process to pyruvate                    | 6 of 25          | 6.11e-13             |
| GO:0061621 | canonical glycolysis                                     | 6 of 25          | 6.11e-13             |
| GO:0019359 | nicotinamide nucleotide biosynthetic process             | 7 of 68          | 6.11e-13             |
| GO:0006735 | NADH regeneration                                        | 6 of 25          | 6.11e-13             |
| GO:0046034 | ATP metabolic process                                    | 8 of 190         | 3.02e-12             |
| GO:0009166 | nucleotide catabolic process                             | 7 of 101         | 5.01e-12             |
| GO:0017144 | drug metabolic process                                   | 10 of 622        | 6.59e-12             |
| GO:0006091 | generation of precursor metabolites and energy           | 9 of 388         | 7.03e-12             |
| GO:0009167 | purine ribonucleoside monophosphate metabolic process    | 8 of 230         | 9.28e-12             |
| GO:0009435 | NAD biosynthetic process                                 | 6 of 51          | 1.30e-11             |
| GO:0072521 | purine-containing compound metabolic process             | 9 of 478         | 3.36e-11             |
| GO:0006732 | coenzyme metabolic process                               | 8 of 297         | 5.31e-11             |
| GO:0046394 | carboxylic acid biosynthetic process                     | 8 of 311         | 7.49e-11             |
| GO:0090407 | organophosphate biosynthetic process                     | 9 of 577         | 1.53e-10             |
| GO:0055086 | nucleobase-containing small molecule metabolic process   | 9 of 662         | 4.97e-10             |
| GO:0006006 | glucose metabolic process                                | 6 of 113         | 8.97e-10             |
| GO:0005975 | carbohydrate metabolic process                           | 8 of 457         | 1.28e-09             |
| GO:0006094 | gluconeogenesis                                          | 5 of 46          | 1.42e-09             |
| GO:0019752 | carboxylic acid metabolic process                        | 9 of 854         | 3.98e-09             |
| GO:1901566 | organonitrogen compound biosynthetic process             | 10 of 1370       | 7.12e-09             |
| GO:0019637 | organophosphate metabolic process                        | 9 of 1011        | 1.58e-08             |
| GO:1901135 | carbohydrate derivative metabolic process                | 9 of 1083        | 2.79e-08             |
| GO:0044281 | small molecule metabolic process                         | 10 of 1779       | 7.84e-08             |
| GO:0016310 | phosphorylation                                          | 9 of 1236        | 8.22e-08             |
| GO:0055114 | oxidation-reduction process                              | 8 of 923         | 2.27e-07             |
| GO:1901575 | organic substance catabolic process                      | 9 of 1609        | 7.90e-07             |
| GO:0044248 | cellular catabolic process                               | 9 of 1646        | 9.43e-07             |
| GO:1901564 | organonitrogen compound metabolic process                | 11 of 5281       | 0.00020              |
| GO:0006600 | creatine metabolic process                               | 2 of 11          | 0.00025              |
| GO:0044275 | cellular carbohydrate catabolic process                  | 2 of 26          | 0.0012               |
| GO:0051402 | neuron apoptotic process                                 | 2 of 40          | 0.0026               |
| GO:0042398 | cellular modified amino acid biosynthetic process        | 2 of 41          | 0.0027               |

**Figure S1:** Reproducibility of 2D-gels: CT1 to GH6.

Focused strips were equilibrated in two steps as follows: 15 min with equilibration buffer I (65 mM DTT, 50 mM Tris-HCl, 6 M urea, 30% glycerol, 2% SDS, bromophenol blue) and then 15 min with equilibration buffer II (135 mM iodoacetamide, 50 mM Tris-HCl, 6 M urea, 30% glycerol, 2% SDS, bromophenol blue). The equilibrated strips were applied directly onto 12.5% polyacrylamide gels, sealed with 0.5% w/v agarose, and separated at a constant voltage of 50 V for 30 min followed by 200 V for about 6 h, until the blue dye reached the bottom on an Ettan DALT II system (Amersham Biosciences, Stockholm, Sweden). The resolved proteins were fixed for 1 h in 40% v/v methanol containing 10% v/v acetic acid and stained overnight using colloidal Coomassie Blue G-250. Gel staining was removed by washing steps with distilled water until the best visualization was achieved.

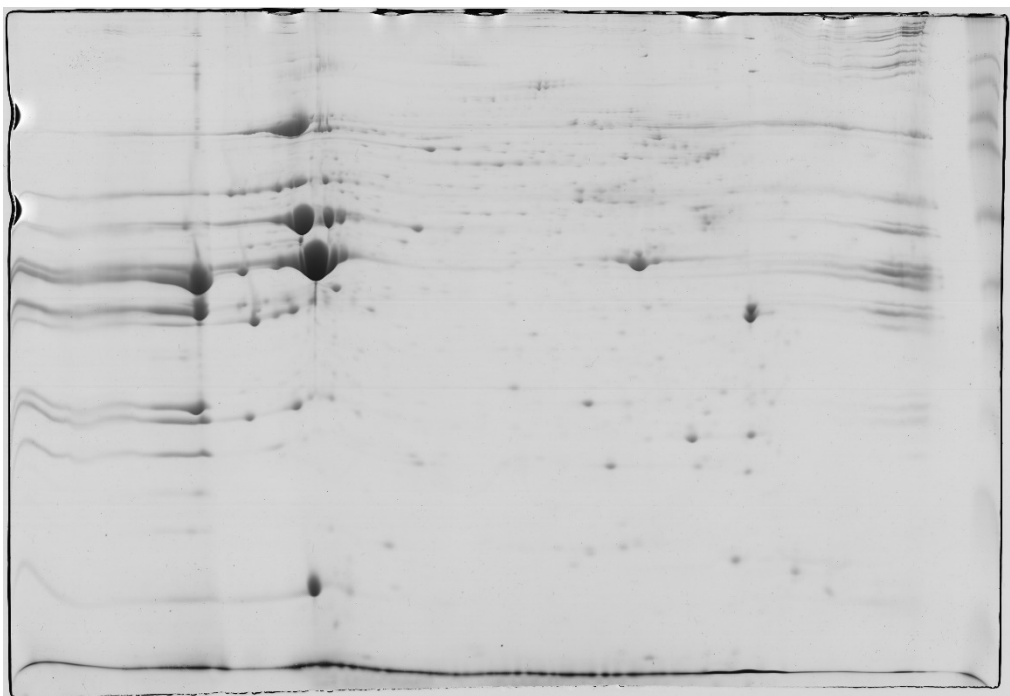

CT1

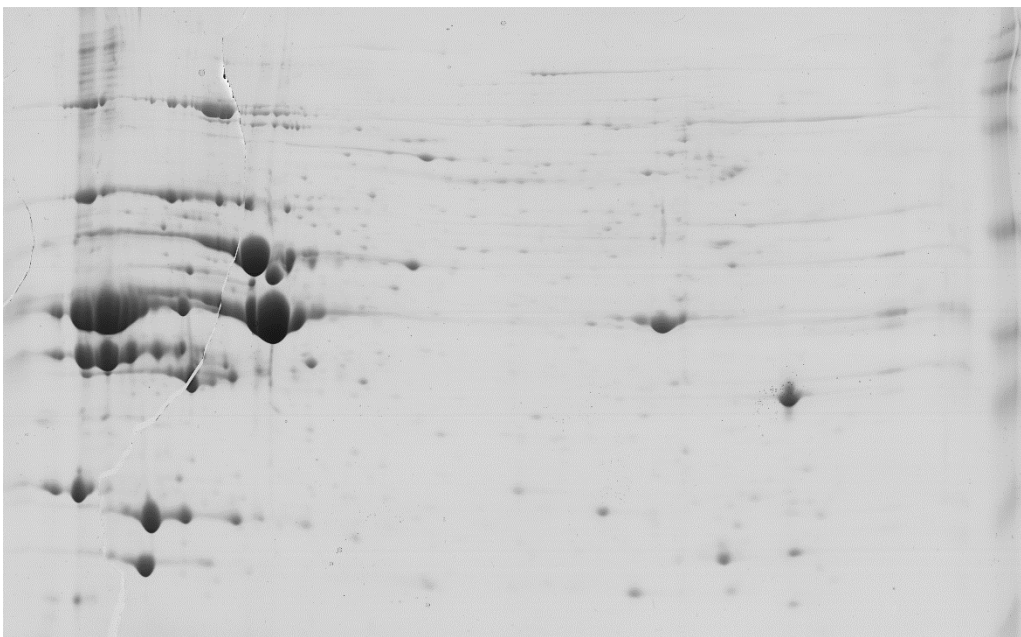

CT2

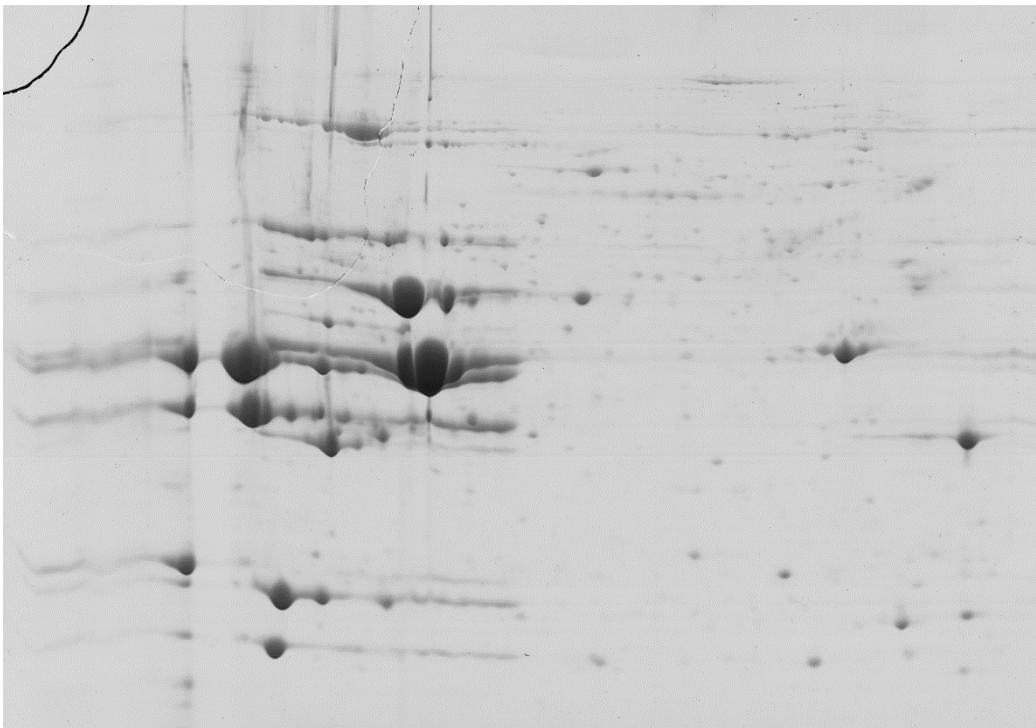

**CT3**

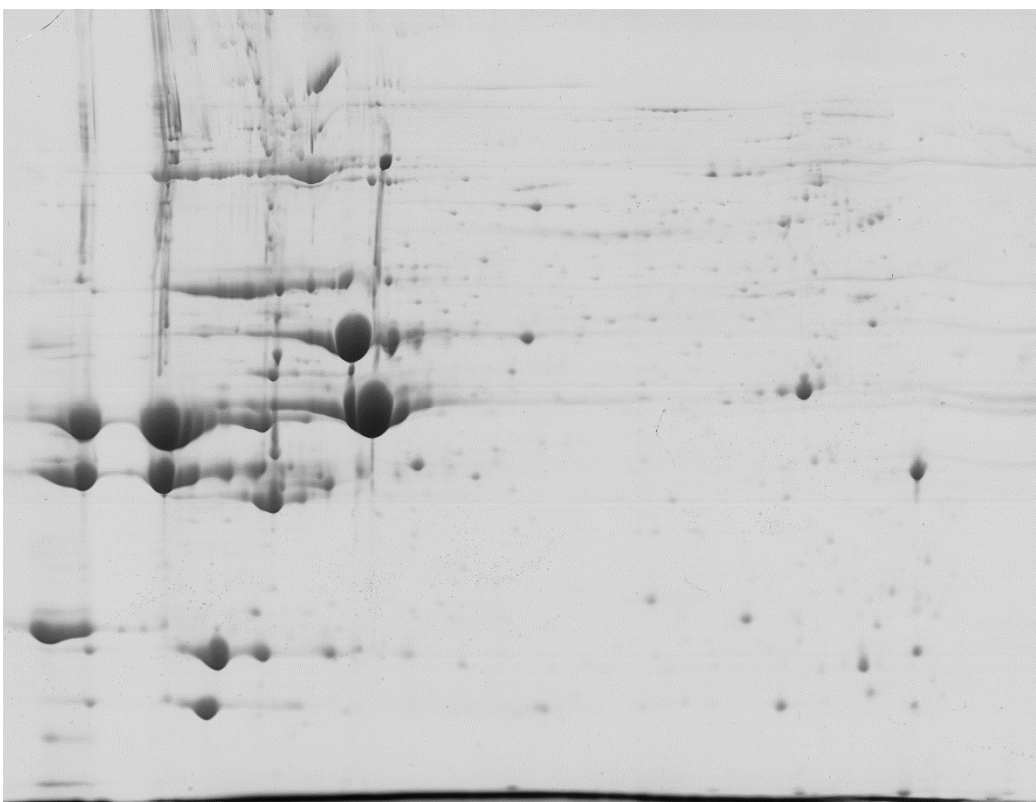

**CT4**

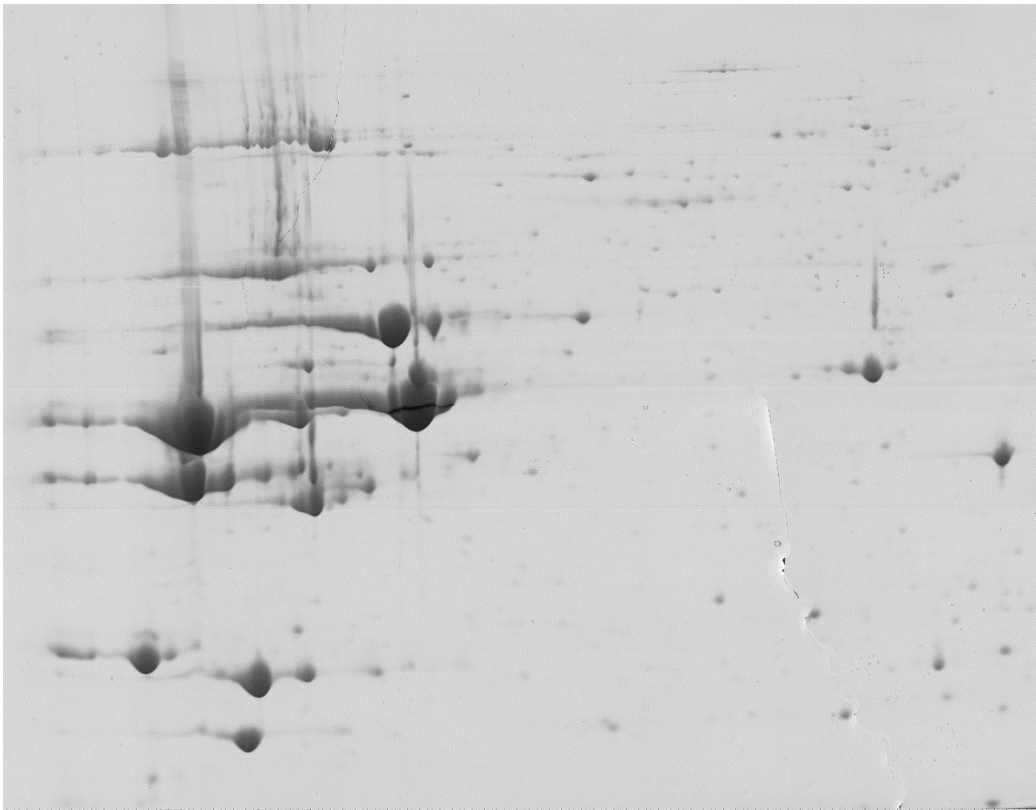

CT5

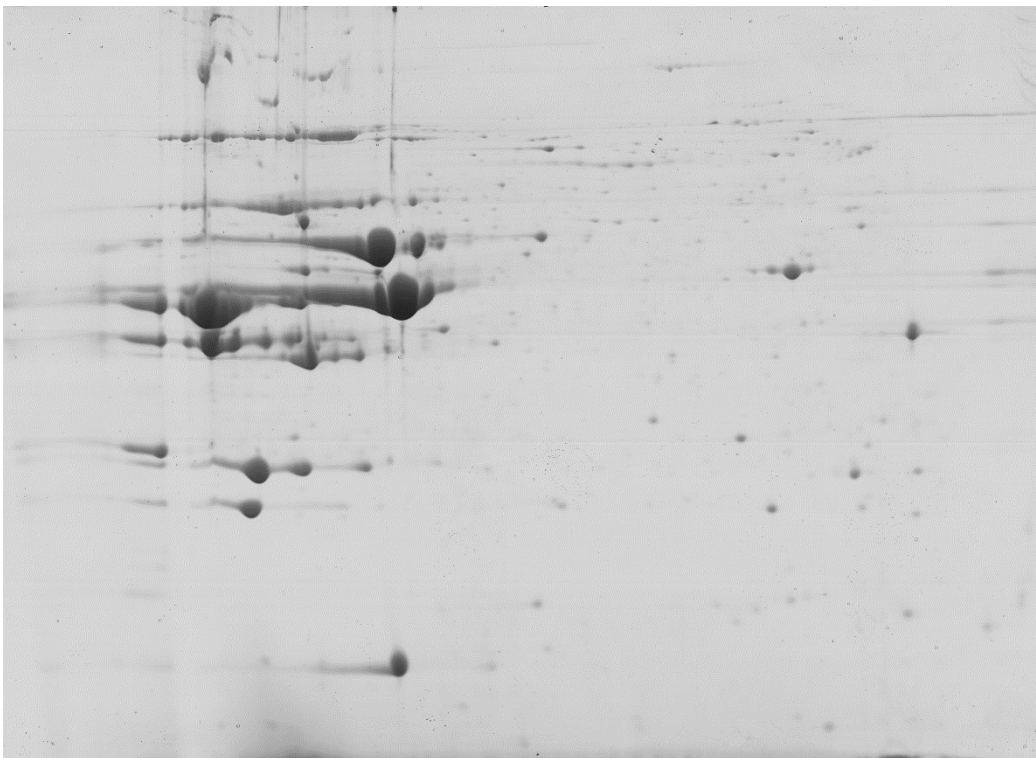

CT6



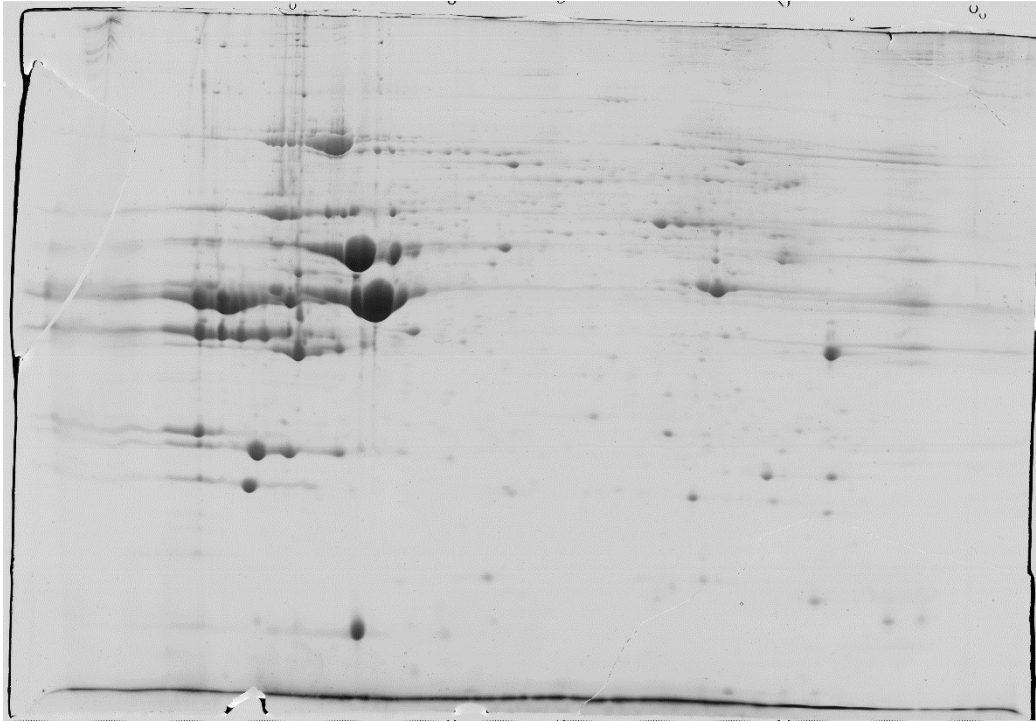

**GH1**

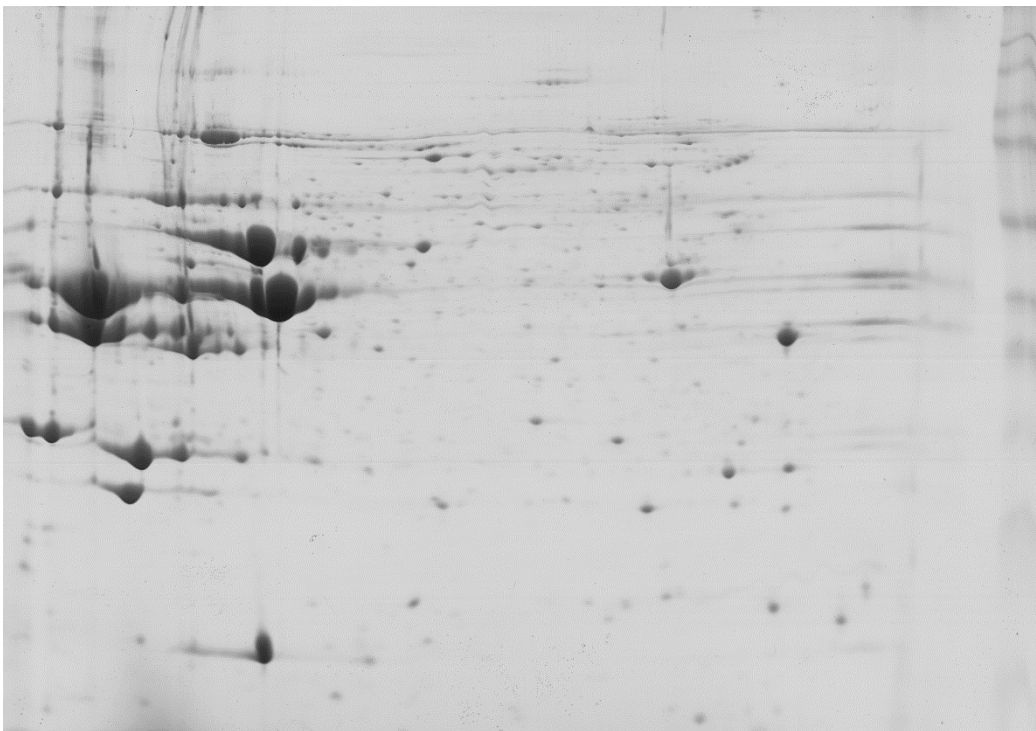

**GH2**

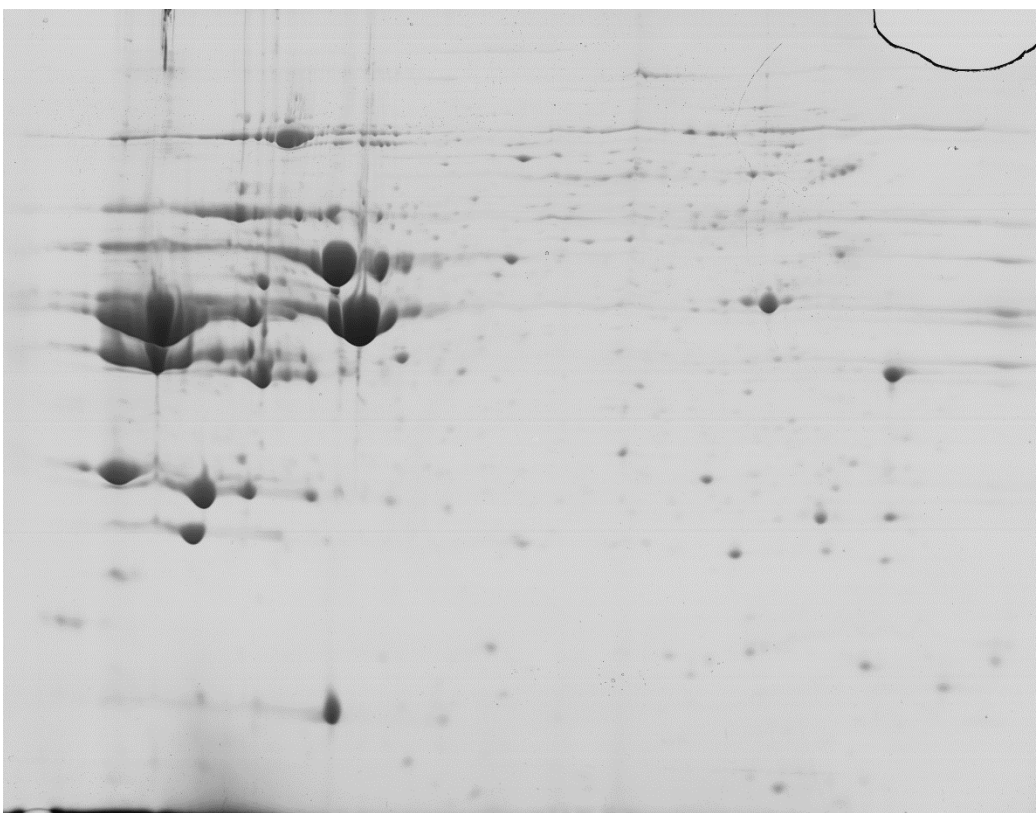

**GH3**

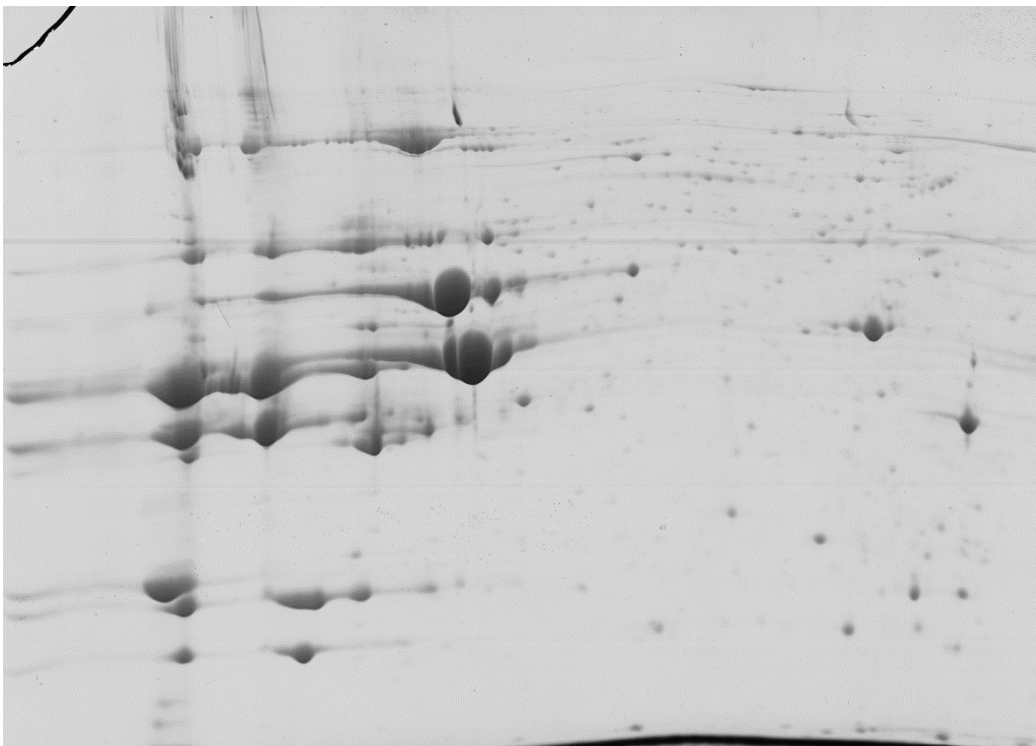

**GH4**



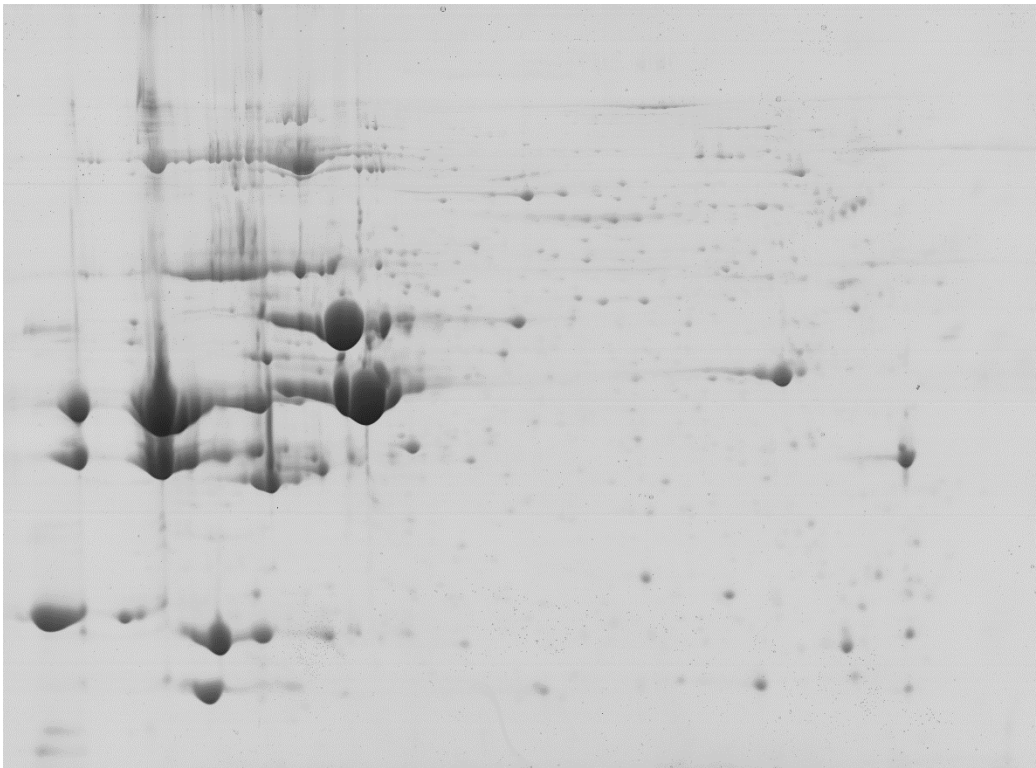

**GH5**

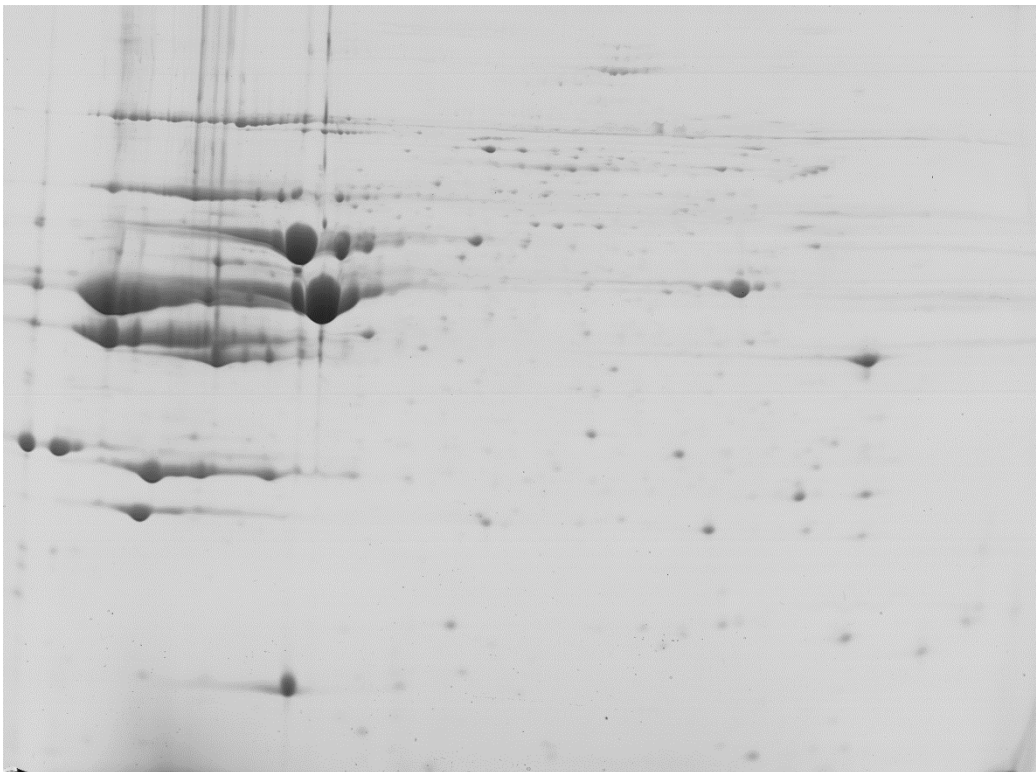

**GH6**

Table S2: Raw data spots

| Match ID | CT1_II   | CT2_II   | CT3_II   | CT4_II   | CT5_II   | MCT6_II  | MeanCT   | Desvest  | ESM      | MGH1_II  | GH2_II   | GH3_II   | GH4_II   | GH5_II   | GH6_II   | Mean GH  | Desvest  | ESM      | Mean GH/Ct |
|----------|----------|----------|----------|----------|----------|----------|----------|----------|----------|----------|----------|----------|----------|----------|----------|----------|----------|----------|------------|
| 494      | 0.526456 | 0.508326 | 0.524113 | 0.551016 | 0.600511 | 0.428535 | 0.52316  | 0.056471 | 0.023054 | 0.487267 | 0.193295 | 0.44393  | 0.514427 | 0.309416 | 0.263126 | 0.368577 | 0.131439 | 0.05366  | 0.70       |
| 157      | 0.190232 | 0.182296 | 0.173447 | 0.303621 | 0.157581 | 0.421333 | 0.238085 | 0.103862 | 0.042401 | 0.174278 | 0.099987 | 0        | 0.189526 | 0.146346 | 0.052625 | 0.11046  | 0.073848 | 0.030148 | 0.46       |
| 125      | 0.1106   | 0.280456 | 0.056559 | 0.176175 | 0.298126 | 0.406929 | 0.221474 | 0.130606 | 0.05332  | 0.053052 | 0.053052 | 0.053052 | 0.053052 | 0.053052 | 0.053052 | 0.053052 | 0        | 0        | 0.24       |
| 538      | 0.300832 | 0.25241  | 0.203612 | 0.303621 | 0.132027 | 0.406929 | 0.266572 | 0.094354 | 0.03852  | 0.320102 | 0.433276 | 0.29471  | 0.367448 | 0.393042 | 0.408857 | 0.369573 | 0.053308 | 0.021763 | 1.39       |
| 158      | 0.061936 | 0.154251 | 0.075412 | 0.153685 | 0.106474 | 0.396125 | 0.15798  | 0.122833 | 0.050147 | 0.078247 | 0.033327 | 0.018653 | 0.019339 | 0.079445 | 0.048577 | 0.046265 | 0.02751  | 0.011231 | 0.29       |
| 540      | 0.30968  | 0.392638 | 0.331813 | 0.251143 | 0.32368  | 0.392524 | 0.33358  | 0.053722 | 0.021932 | 0.246305 | 0.246305 | 0.246305 | 0.246305 | 0.246305 | 0.246305 | 0.246305 | 0        | 0        | 0.74       |
| 117      | 0.159264 | 0.262927 | 0.260171 | 0.269885 | 0.251278 | 0.388923 | 0.265408 | 0.073179 | 0.029875 | 0.105559 | 0.105559 | 0.105559 | 0.105559 | 0.105559 | 0.105559 | 0.105559 | 0        | 0        | 0.40       |
| 37       | 0.039816 | 0.217353 | 0.162136 | 0.269885 | 0.32368  | 0.381721 | 0.232432 | 0.12189  | 0.049761 | 0.081804 | 0.123309 | 0.044766 | 0.104433 | 0.112895 | 0.048577 | 0.085964 | 0.033387 | 0.01363  | 0.37       |
| 541      | 0.314104 | 0.343558 | 0.207383 | 0.23615  | 0.28109  | 0.345709 | 0.287999 | 0.057155 | 0.023334 | 0.436312 | 0.436312 | 0.436312 | 0.436312 | 0.436312 | 0.436312 | 0.436312 | 0        | 0        | 1.51       |
| 717      | 0.057512 | 0.070111 | 0.113118 | 0.161181 | 0.110733 | 0.338507 | 0.14186  | 0.103054 | 0.042072 | 0.028454 | 0        | 0        | 0.046415 | 0        | 0.048577 | 0.020574 | 0.023596 | 0.009633 | 0.15       |
| 909      | 0.13272  | 0.091148 | 0.041477 | 0.041233 | 0        | 0.302496 | 0.101512 | 0.108645 | 0.044354 | 0.298762 | 0.253283 | 0.436469 | 0.278487 | 0.292691 | 0.396713 | 0.326068 | 0.072939 | 0.029777 | 3.21       |
| 124      | 0.185808 | 0.343558 | 0.120659 | 0.074968 | 0.396082 | 0.273686 | 0.23246  | 0.126723 | 0.051735 | 0.073398 | 0.073398 | 0.073398 | 0.073398 | 0.073398 | 0.073398 | 0.073398 | 1.52E-17 | 6.21E-18 | 0.32       |
| 508      | 0.19908  | 0.22787  | 0.177218 | 0.333608 | 0.36201  | 0.273686 | 0.262245 | 0.074267 | 0.030319 | 0.192061 | 0.259948 | 0.141759 | 0.146979 | 0.075263 | 0.052625 | 0.144773 | 0.075945 | 0.031004 | 0.55       |
| 94       | 0.159264 | 0.287467 | 0.120659 | 0.048729 | 0.289608 | 0.266484 | 0.195369 | 0.100805 | 0.041154 | 0.071134 | 0.063325 | 0.14922  | 0.050282 | 0.071082 | 0.052625 | 0.076278 | 0.036816 | 0.01503  | 0.39       |
| 500      | 0.24332  | 0.168273 | 0.196071 | 0.153685 | 0.340715 | 0.255681 | 0.226291 | 0.068989 | 0.028165 | 0.125606 | 0.125606 | 0.125606 | 0.125606 | 0.125606 | 0.125606 | 0.125606 | 0        | 0        | 0.56       |
| 493      | 0.230048 | 0.238387 | 0.226236 | 0.247395 | 0.383305 | 0.25208  | 0.262909 | 0.059798 | 0.024413 | 0.192061 | 0        | 0.152951 | 0.228205 | 0        | 0.149779 | 0.120499 | 0.097644 | 0.039863 | 0.46       |
| 774      | 0.106176 | 0.091148 | 0.101806 | 0.026239 | 0.042589 | 0.237675 | 0.100939 | 0.074573 | 0.030444 | 0.02134  | 0        | 0        | 0.034811 | 0        | 0.032387 | 0.014756 | 0.016791 | 0.006855 | 0.15       |
| 681      | 0.482216 | 0.382121 | 0.324271 | 0.142439 | 0.340715 | 0.237675 | 0.31824  | 0.117394 | 0.047926 | 0.046237 | 0.14997  | 0.026114 | 0.116036 | 0.28851  | 0.024289 | 0.108526 | 0.101918 | 0.041608 | 0.34       |
| 728      | 0.08848  | 0.161262 | 0.173447 | 0.386086 | 0.353492 | 0.234074 | 0.232807 | 0.116218 | 0.047446 | 0.116995 | 0.116995 | 0.116995 | 0.116995 | 0.116995 | 0.116995 | 0.116995 | 0        | 0        | 0.50       |
| 523      | 0.17696  | 0.133216 | 0.214924 | 0.243646 | 0.259796 | 0.201664 | 0.205034 | 0.045924 | 0.018748 | 0.074691 | 0        | 0.14922  | 0.112168 | 0.150527 | 0.056673 | 0.090546 | 0.05849  | 0.023878 | 0.44       |
| 84       | 0.238896 | 0.04908  | 0.098036 | 0.337357 | 0.136286 | 0.194461 | 0.175686 | 0.104016 | 0.042464 | 0.05335  | 0.136639 | 0.037305 | 0.042547 | 0.058538 | 0.032385 | 0.060127 | 0.038735 | 0.015814 | 0.34       |
| 625      | 0.24332  | 0.196319 | 0.098036 | 0.183672 | 0.24276  | 0.19086  | 0.192494 | 0.053155 | 0.021701 | 0.081804 | 0.099987 | 0.2201   | 0.058018 | 0.108714 | 0.048577 | 0.102867 | 0.061949 | 0.025291 | 0.53       |
| 100      | 0.106176 | 0.133216 | 0.045247 | 0.18742  | 0.259796 | 0.183658 | 0.152586 | 0.074463 | 0.030399 | 0.05335  | 0        | 0        | 0.146979 | 0        | 0        | 0.033388 | 0.059599 | 0.024331 | 0.22       |
| 905      | 0        | 0.140228 | 0.169677 | 0.089962 | 0        | 0.162051 | 0.093653 | 0.077695 | 0.031719 | 0.017281 | 0.017281 | 0.017281 | 0.017281 | 0.017281 | 0.017281 | 0.017281 | 0        | 0        | 0.18       |
| 118      | 0.17696  | 0.171779 | 0.177218 | 0.157433 | 0.144804 | 0.147647 | 0.16264  | 0.014636 | 0.005975 | 0.039124 | 0        | 0        | 0.259148 | 0        | 0.036433 | 0.055784 | 0.101336 | 0.04137  | 0.34       |
| 126      | 0.1106   | 0.220859 | 0.026394 | 0.112452 | 0.208688 | 0.147647 | 0.137773 | 0.071853 | 0.029334 | 0.062163 | 0.062163 | 0.062163 | 0.062163 | 0.062163 | 0.062163 | 0.062163 | 0        | 0        | 0.45       |
| 169      | 0.057512 | 0.147239 | 0.098036 | 0.134943 | 0.132027 | 0.147647 | 0.119567 | 0.035385 | 0.014446 | 0.192061 | 0.323269 | 0.141759 | 0.154715 | 0.146346 | 0.178116 | 0.189378 | 0.068384 | 0.027918 | 1.58       |

[illegible]

## **Supplementary text**

### **Details of LC-MS/MS analysis**

The dried-down peptide mixtures were analysed in a nanoAcquity liquid chromatographer (Waters, Mildorf, MA, USA) coupled to a LTQ-Orbitrap Velos (Thermo Scientific, Bremen, Germany) mass spectrometer. The tryptic digests were resuspended in 1% FA solution and an aliquot was injected for chromatographic separation. Peptides were trapped on a Symmetry C18™ trap column (5µm 180µm x 20mm; Waters), and were separated using a C18 reverse phase capillary column (ACQUITY UPLC M-Class Peptide BEH column; 130A, 1.7µm, 75 µm x250 mm, Waters). The gradient used for the elution of the peptides was 1 to 40 % B in 25 minutes, followed by gradient from 40% to 60% in 5min (A: 0.1% FA; B: 100% ACN, 0.1%FA), with a 250nL/min flow rate. Eluted peptides were subjected to electrospray ionization in an emitter needle (PicoTip™, New Objective) with an applied voltage of 2000V. Peptide masses (m/z 300-1700) were analyzed in data dependent mode where a full Scan MS was acquired in the Orbitrap with a resolution of 60,000 FWHM at 400m/z. Up to the 10th most abundant peptides (minimum intensity of 500 counts) were selected from each MS scan and then fragmented in the linear ion trap using CID (38% normalized collision energy) with helium as the collision gas. The scan time settings were: Full MS: 250 ms (1 microscan) and MSn: 120 ms. Generated .raw data files were collected with Thermo Xcalibur (v.2.2).

### **Details of Data base search**

The .raw files obtained in the mass spectrometry analyses were used to search against the public database Uniprot Actinopterygii (v.23/3/17). A database containing common laboratory contaminant proteins was added to this database. The software used was Thermo Proteome Discoverer (v.1.4.1.14) with Sequest HT as the search engine. The following search parameters were applied: Database/Taxonomy: Uniprot\_Actinopterygii\_cont; Enzyme specificity: Trypsin Max. miscleavage sites 2; Fixed modifications: Carbamidomethyl (C); Variable modifications: Oxidation (M); Peptide tolerance: 10 ppm and 0.6Da (respectively for MS and MS/MS spectra); Percolator Target FDR (Strict): 0.01; Validation based on: q-Value. Both a target and a decoy database were searched in order to obtain a false discovery rate (FDR), and thus estimate the number of incorrect peptide-spectrum matches that exceed a given threshold. The search results were visualized in Proteome Discoverer (v.1.4.1.14) and exported to Excel as lists of identified proteins. The results have been filtered so only proteins identified with at least 2 high confidence (FDR> 1%) peptides are included in the lists. All possible protein identifications from analyses that met the above criteria were reported for each gel spot. However, the protein identification with the highest score, discarding contaminants, was selected in the case of redundant protein identifications. The Batch-Genes tool produced by GOEAST (<http://omicslab.genetics.ac.cn/GOEAST/>) performed enrichment analyses of Gene Ontology (GO) annotation terms for biological processes. The proteomics work was done at the Proteomics Platform of Barcelona Science Park, University of Barcelona, a member of ProteoRed-ISCI network.
